# Supplementary material for: Adhesive-based bonding technique for PDMS microfluidic devices
Source: Royal Society of Chemistry journal article supplement (doi:10.1039/c2lc40978j), 2012-12-05
Supplement: c2lc40978j.pdf [file c2lc40978j.pdf]

RSC Manuscript ID LC-COM-08-2012-040978

Title: Adhesive-based bonding technique for PDMS microfluidic devices

### Electronic Supplementary Information (ESI)

This document contains measurements of the thickness and surface roughness of all tapes used in the study.

#### *Methods: Adhesive tape surface roughness measurement*

To measure the surface roughness of the adhesive coatings of our tapes, we first created molds of the tape surfaces. A sample of each tape was adhered to the bottom of a plastic Petri dish with the adhesive side facing upwards. PDMS elastomer (Sylgard) was prepared by mixing the elastomer base with crosslinker at a 10:1 weight ratio using a Dremel hand drill. The mixture was degassed under vacuum for 30 minutes, poured into the Petri dish, and cured for 2 hours at 65°C. After the PDMS was cured, thin cross-sections of each sample were cut using a razor blade. The surface of each cross-section was viewed using bright field microscopy with a 40x objective. ImageJ was used to quantify the surface roughness ( $R_a$ ) for each sample.

| Tape                                | Thickness | Roughness, $R_a$    |
|-------------------------------------|-----------|---------------------|
| Scotch® Magic™ Tape                 | .0635 mm  | < 0.2 $\mu\text{m}$ |
| Scotch® Permanent Double Sided Tape | .0762 mm  | 2.6 $\mu\text{m}$   |
| Scotch® MultiTask Tape              | .0584 mm  | < 0.2 $\mu\text{m}$ |

**ESI Table 1.** Adhesive tape specifications. Thickness values provided by the manufacturer. Resolution of the  $R_a$  measurement was 0.2  $\mu\text{m}$ .

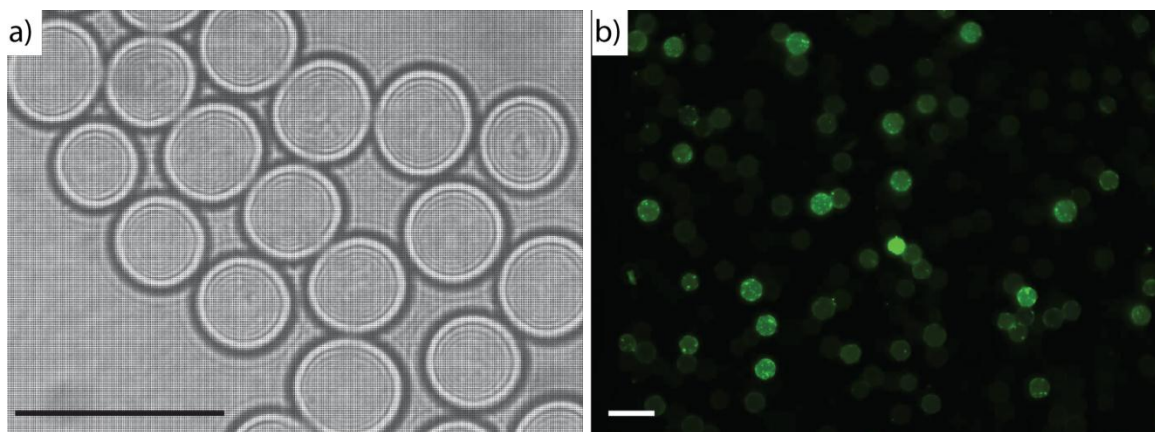

**ESI Fig. 1** PDMS-tape bonded devices are compatible with higher magnification imaging and fluorescence imaging. Droplets were imaged in a reservoir device bonded with Scotch® MultiTask tape. (a) 40x bright field image. (b) 10x fluorescent image of fluorescein droplets. Scale bars represent 50  $\mu\text{m}$ .
